# Supplementary material
Source: PubMed Central journal article supplement (PMC9126729)
Supplement: NIHMS1732353-supplement-2.pdf [file NIHMS1732353-supplement-2.pdf]

## Supplemental Information

### Supplemental Figure Legends

**Figure S1. Kaplan-Meier plots of overall survival from the S1320 trial stratified by prior exposure to ICT, Related to [Figure 1](#).** Results from univariate Cox regression model.

**Figure S2. Impacts of treatment regimens containing anti-PD-L1 and/or MEKi on tumor cells, CD45<sup>+</sup> cells, CD45<sup>+</sup> sub-populations, and CD8<sup>+</sup> T-cell sub-populations, Related to [Figure 2](#).**

(A) Immunofluorescence of p-ERK levels in tumors of indicated tumor models, with or without trametinib treatment (3 days). DAPI, nuclear stain. Scale bar, 50  $\mu\text{m}$ . Representative images shown for two of five tumors analyzed per group.

(B) Tumor volumes of mSK-Mel254 treated with indicated regimens and on the timelines in [Figure 2A](#). Trametinib at 3 mg/kg/d. Anti-PD-L1 (200  $\mu\text{g}/\text{mouse}$ ) and anti-CTLA-4 (200  $\mu\text{g}/\text{mouse}$ ), both twice per week IP. N = 8 tumors/group. Data are means  $\pm$  SEMs (P-values, Student t-test).

(C, D, E, G) Frequencies of CD45<sup>+</sup> population in the total live cells (C), immune cell types in the CD45<sup>+</sup> population (D), CD4<sup>+</sup> Th1-like T-cells in the CD45<sup>+</sup> population (E), and CD8<sup>+</sup> subsets in the CD8<sup>+</sup> population (G) of three syngeneic tumor models. Mean  $\pm$  SEMs. Pairwise comparisons were performed in (i) vehicle vs. two doses of anti-PD-L1, (ii) MEKi starting d7 vs. anti-PD-L1 d0-d7, MEKi starting d7, (iii) MEKi+anti-PD-L1 starting d7 vs.

anti-PD-L1 d0-d7, anti-PD-L1+MEKi starting d7. P-value, Student's *t* test. \**p* < 0.05, \*\**p* < 0.01 and \*\*\**p* < 0.001. See [Figure 2A](#).

(F) Heatmaps showing the expression values of immune phenotypic protein markers across multiple subsets in tumor-infiltrating CD8<sup>+</sup> cells analyzed by CyTOF in three indicated syngeneic SC tumor models. The expression values of each marker were normalized to the maximum mean value across subsets. T<sub>CM</sub> (central memory): CD62L<sup>+</sup>CD44<sup>+</sup>GZMB<sup>-</sup>; T<sub>EM</sub> (effector memory): CD62L<sup>-</sup>CD44<sup>+</sup>GZMB<sup>-</sup>; T<sub>C</sub> (cytotoxic): GZMB<sup>+</sup>; T<sub>TD</sub> (terminally differentiated): CD62L<sup>-</sup>CD44<sup>-</sup>GZMB<sup>-</sup>.

**Figure S3. Coupled scRNA-seq/scTCR-seq analysis of mSK-Mel254 tumors from mice undergoing anti-PD-L1 and/or MEKi treatment regimens, Related to [Figure 3](#).**

(A, B) UMAP in [Figure 3A](#) colored by single-cell expression patterns of indicated cell lineage markers (A) and TCR (B).

(C to E) Frequencies of immune subpopulations in the CD45<sup>+</sup> population (C), Mo/MΦ subpopulations among CD45<sup>+</sup> cells (D), subpopulations among CD4<sup>+</sup> T-cells (E, top) and CD8<sup>+</sup> T-cells (E, bottom). See [Figure 2A](#).

(F) Boxplots of *Tcf1*<sup>+</sup> stem-like gene signature scores in CD8<sup>+</sup> T-cell subsets. Pairwise comparisons were performed in (i) vehicle vs. anti-PD-L1 d0-d7, (ii) MEKi d7 vs. anti-PD-L1 d0-d7, MEKi d7, (iii) anti-PD-L1+MEKi d7 vs. anti-PD-L1 d0-d7, anti-PD-L1+MEKi d7. P-value, Wilcoxon test. \**p* < 0.05, \*\*\**p* < 0.001. See [Figure 2A](#).

(G) Heatmap displaying the scaled mean expression levels of highlighted genes (rows) in each treatment regimen group and time point (column) for T<sub>C</sub>, T<sub>REG</sub>, T<sub>H1</sub>/T<sub>H2</sub>, NKT and

T<sub>γδ</sub> subpopulations. See [Figure 2A](#). Gene expression levels were row-scaled across CD8<sup>+</sup> T<sub>C</sub>, T<sub>REG</sub>, T<sub>H1</sub>/T<sub>H2</sub>, NKT, T<sub>γδ</sub>, and Ki-67<sup>hi</sup>CD8<sup>+</sup> subpopulations.

**Figure S4. Anti-PD-L1 lead-in before MAPKi co-treatment optimizes suppression of extracranial and intracranial metastatic progression and augments T-cell clonal expansion, Related to [Figures 5 and 6](#).**

(A) *In vivo* BLI of representative mice bearing metastatic YUMM1.7ER cells from the untreated group on indicated timepoints. All images were adjusted to the same radiance scale.

(B) *Ex vivo* photo (left) and BLI (right) at necropsy of a mouse from the untreated group on day 23 post-IC injection. All images were adjusted to the same radiance scale.

(C, D) Temporal BLI quantification (radiance, photons/sec) based on the dosing timeline in [Figure 5A](#) of ventral extracranial (C) or intracranial (D) tumor burden. Data are mean ± SD based on the indicated numbers of mice in the untreated and treatment regimen groups. Pairwise comparisons (mixed model framework with Bonferroni correction for multiple testing) of the group MEKi d0, anti-PD-L1 d-4 vs. the group denoted by the specific color of symbol #. # p = 0.05-0.001, ## p < 0.001. \*Indicates death of mouse or mice, resulting in drops in mean BLI values. True complete responses or CRs defined in [STAR Methods](#).

(E) Flowchart showing the status of surviving mice from experiment in [Figure 5G](#) as they were monitored and grouped beyond 10 weeks (post MAPKi treatment initiation). Specific

mice (number and color designations in F) and their final status at the end of long-term follow-ups are shown.

(F) Schematic of the individual natural histories of long-term surviving mice from experiment in [Figure 5G](#) (treatment regimens coded by orange and red colors) and their disease, treatment, and vital status.

(G) Tumor cell-involved brain and ovarian tissues were collected from mice at time points and in groups as indicated in [Figure 5A](#) (brain,  $n = 2$  mice per group, except the no treatment group; ovary,  $n = 1$  mouse per group; two geographically distinct regions of each organ site were sampled for TCR-seq analysis). Dot plot showing the diversity and gini clonality indices for  $\alpha$  or  $\beta$  chain in brain or ovarian tissues (red dots, average values). Pairwise comparison was performed between MEKi d0, anti-PD-L1 d-4 and each of the other treatment groups with Student's  $t$  test. P-values, \* $p < 0.05$ , \*\* $p < 0.01$ , \*\*\* $p < 0.001$ .

(H) The total sizes of large TCR clones ( $\geq 8\%$ ) for the  $\alpha$  or  $\beta$  chain in tumor-involved brain or ovarian tissues (red dots, average values). Pairwise comparisons were performed as in E.

(I) The total sizes of largest, top 5, and top 10 TCR clones ( $\geq 8\%$ ) for the  $\alpha$  or  $\beta$  chain in tumor-involved brain or ovarian tissues (red dots, average values). Pairwise comparisons were performed as in E.

(J) Venn plots showing the overlapping fractions of TCR clones ( $\alpha$  or  $\beta$  chain) between brain and ovarian tissues in each individual.

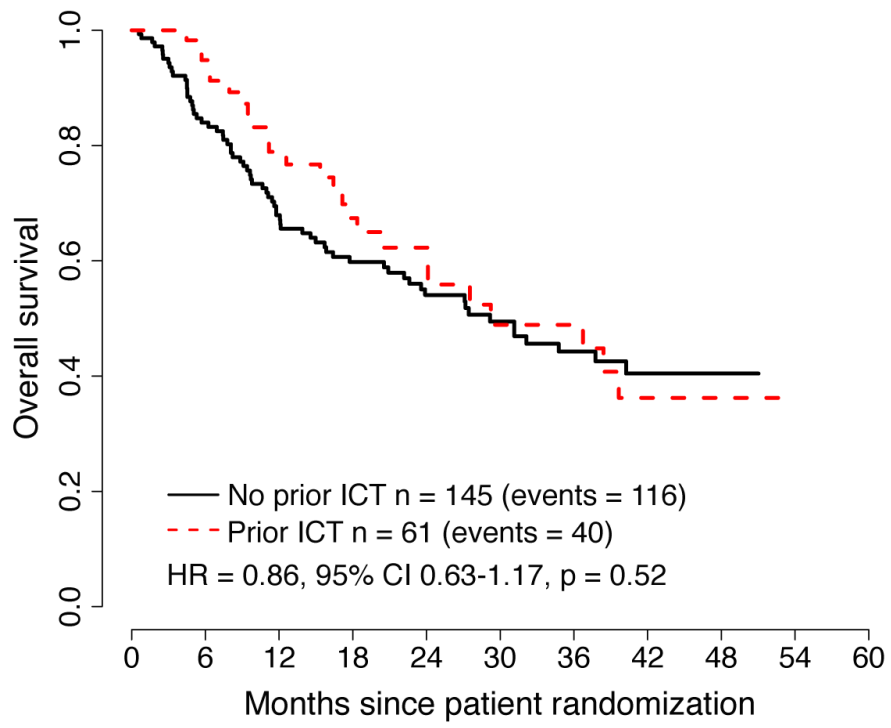

|     |     |    |    |    |    |    |    |   |          |
|-----|-----|----|----|----|----|----|----|---|----------|
| 145 | 112 | 87 | 69 | 53 | 41 | 29 | 16 | 9 | No prior |
| 61  | 53  | 37 | 28 | 20 | 13 | 13 | 8  | 4 | Prior    |

Figure S1

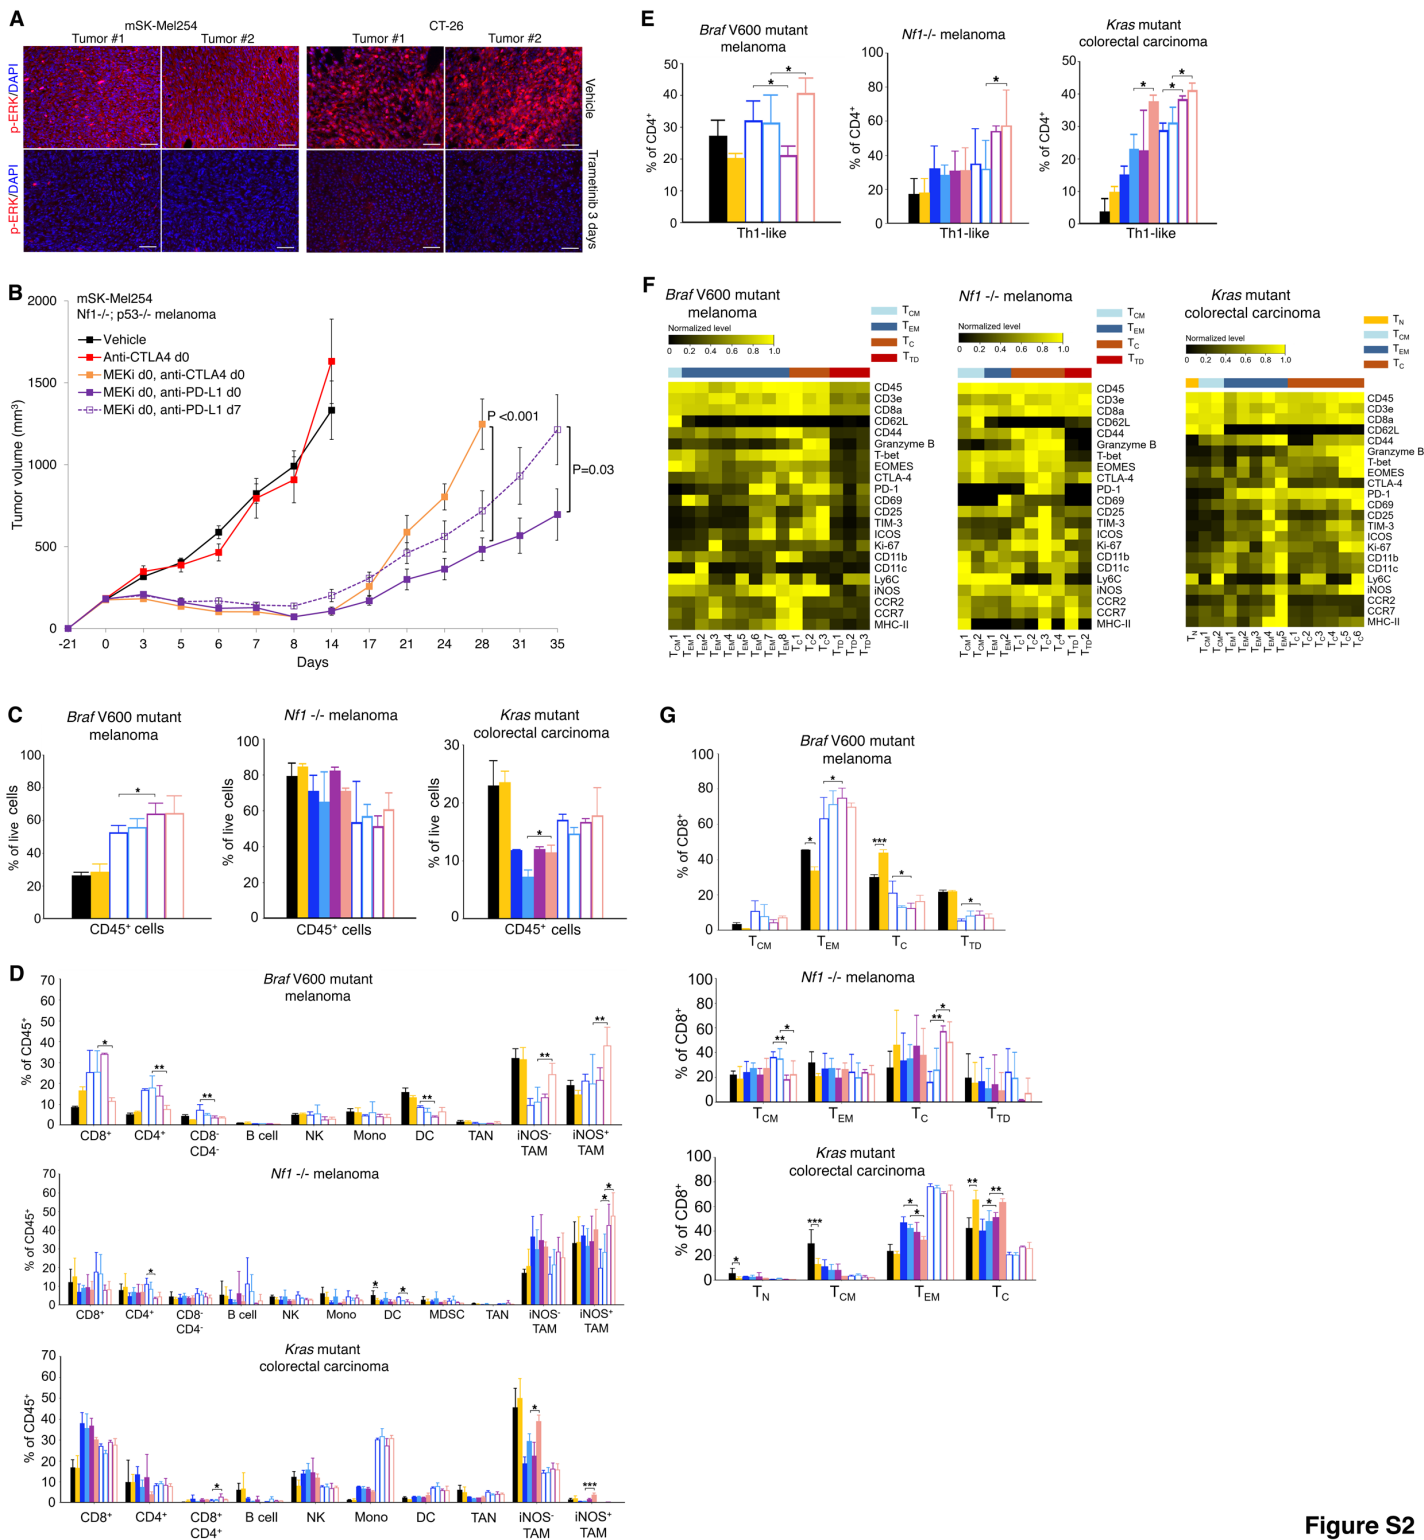

Figure S2

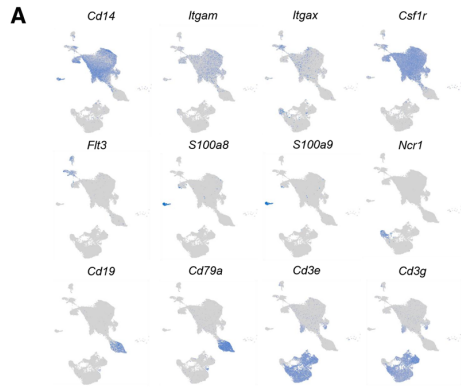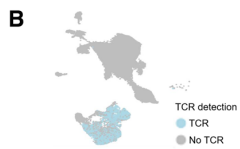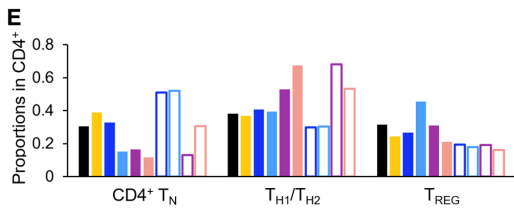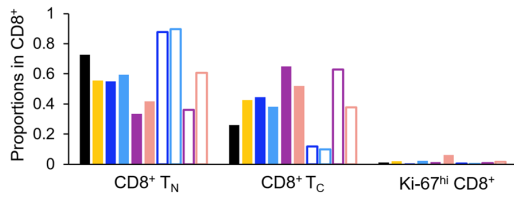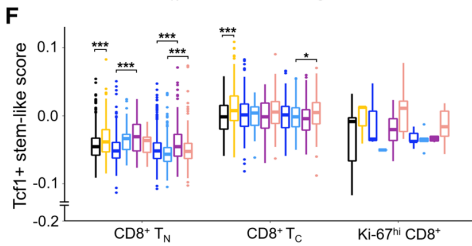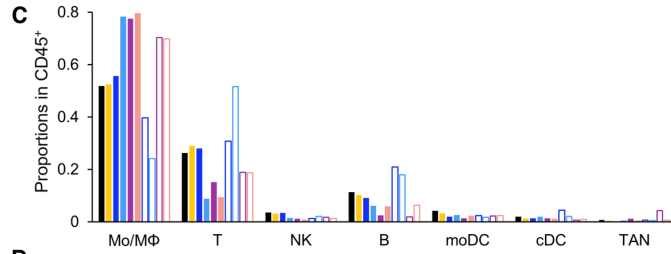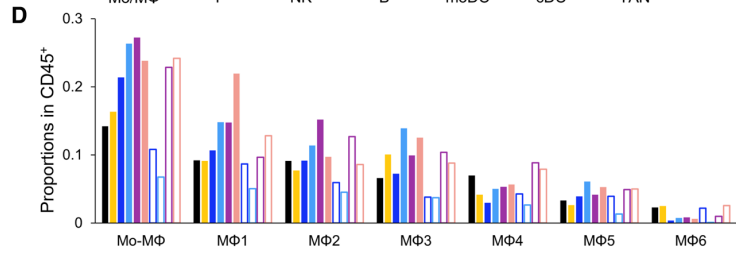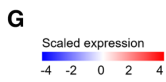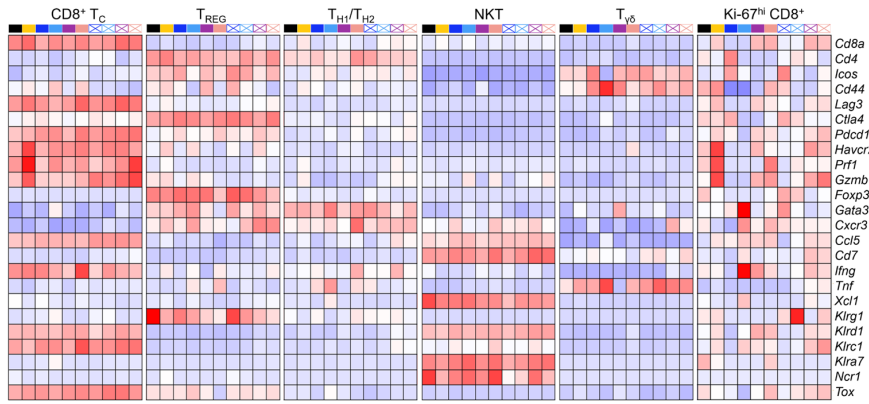

Figure S3

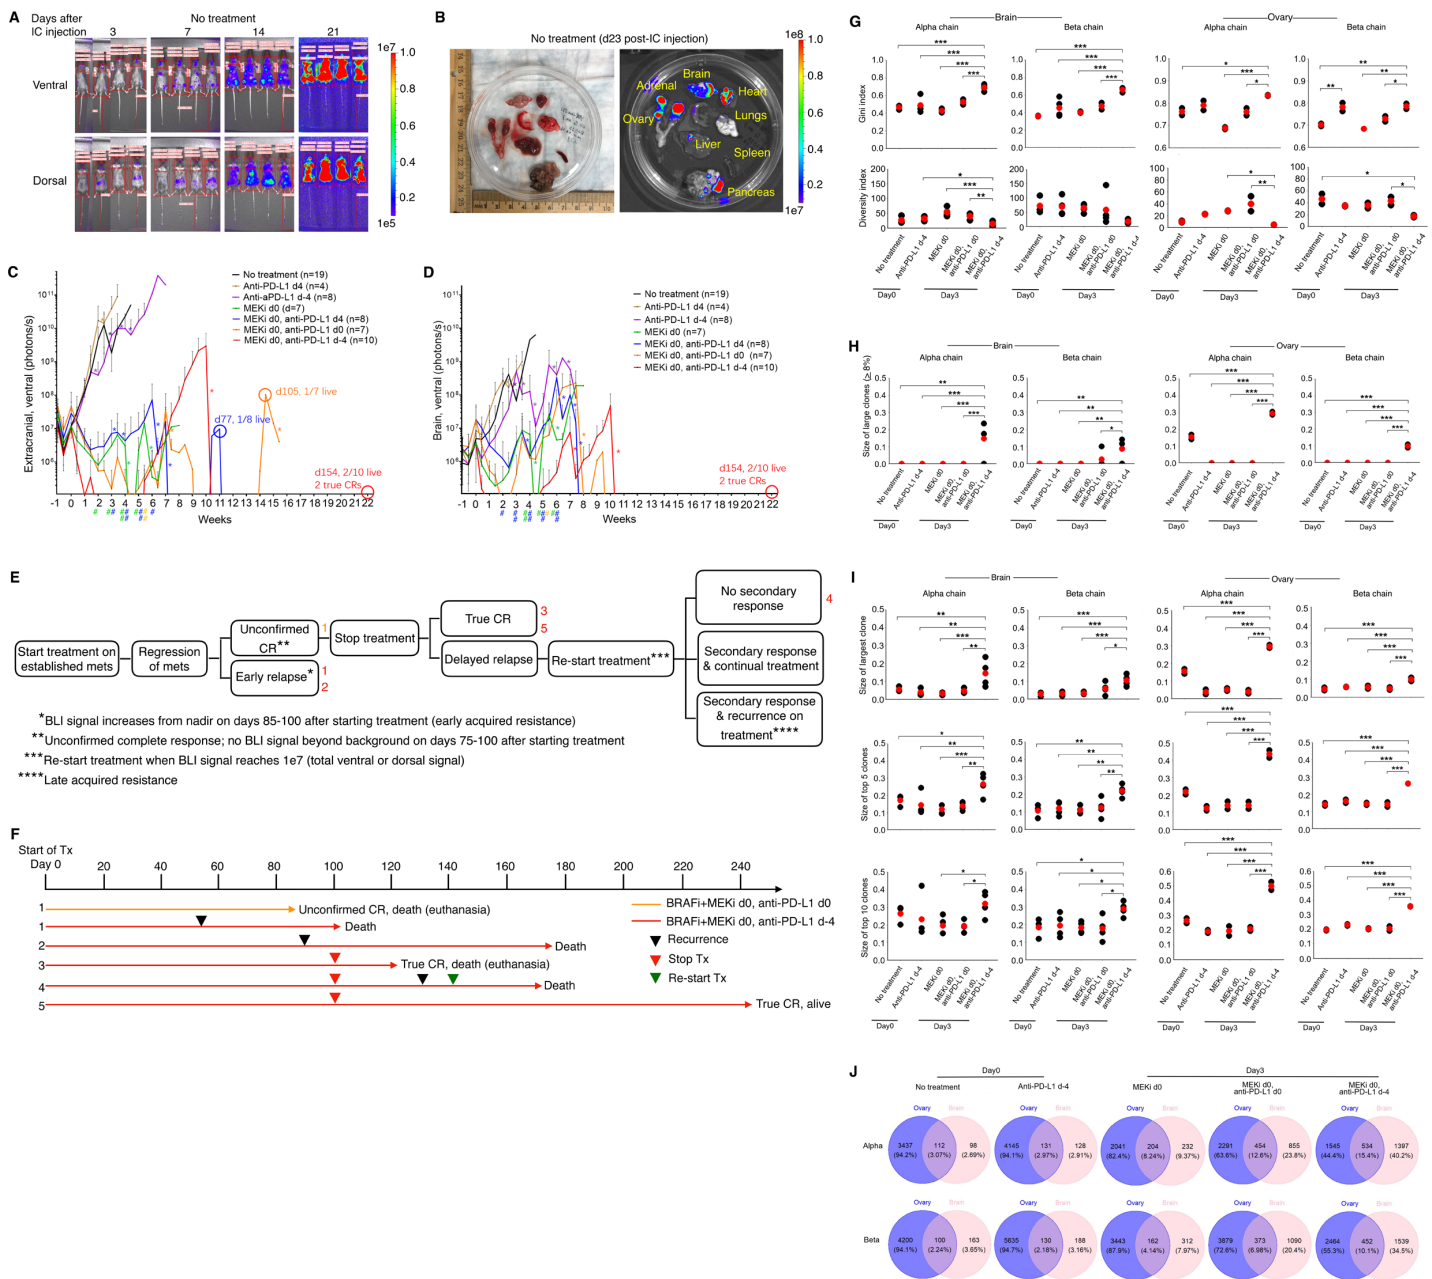

Figure S4



## Supplemental Table Legends

**Table S1. For S1320 trial, associations between baseline patient characteristics and prior ICT, Related to [Figure 1](#).** Median (range) or N (%) reported.

**Table S2. Multivariable Cox regression models for PFS (A) and OS (B), Related to [Figure 1](#).**

**Table S3. Expansion indices as well as top 5 and 10 clone sizes of CD8<sup>+</sup> T<sub>C</sub>, Ki-67<sup>hi</sup> CD8<sup>+</sup> T and T<sub>REG</sub> cells in each treatment regimen group and time point, Related to [Figure 3](#).** See [Figure 2A](#).

Supplemental Table S1

| Factor                       | No prior exposure (N = 145) | Prior checkpoint therapy (N = 61) | P-value |
|------------------------------|-----------------------------|-----------------------------------|---------|
| Randomized arm               |                             |                                   |         |
| Continuous Dosing            | 74 (51)                     | 31 (51)                           | 1       |
| Intermittent Dosing          | 71 (49)                     | 30 (49)                           |         |
| Age at randomization (years) | 62 (52, 69)                 | 58 (47, 67)                       | 0.16    |
| Age at randomization (years) |                             |                                   |         |
| Younger than 45              | 24 (17)                     | 15 (25)                           | 0.18    |
| 45 and older                 | 121 (83)                    | 46 (75)                           |         |
| Gender                       |                             |                                   |         |
| Female                       | 51 (35)                     | 23 (38)                           | 0.75    |
| Male                         | 94 (65)                     | 38 (62)                           |         |
| Race                         |                             |                                   |         |
| White                        | 142 (98)                    | 59 (97)                           | 0.6     |
| Asian and white              | 1 (1)                       | 0 (0)                             |         |
| Native American              | 0 (0)                       | 1 (2)                             |         |
| Unknown race                 | 2 (1)                       | 1 (2)                             |         |
| Ethnicity                    |                             |                                   |         |
| Hispanic                     | 4 (3)                       | 2 (3)                             | 1       |
| Not hispanic                 | 141 (97)                    | 59 (97)                           |         |
| PS                           |                             |                                   |         |
| 0                            | 82 (57)                     | 35 (58)                           | 0.95    |
| 1                            | 60 (42)                     | 24 (40)                           |         |
| 2                            | 2 (1)                       | 1 (2)                             |         |
| LDH at randomization         |                             |                                   |         |
| Elevated LDH                 | 53 (37)                     | 24 (39)                           | 0.75    |
| Normal LDH                   | 92 (63)                     | 37 (61)                           |         |
| Primary                      |                             |                                   |         |
| Cutaneous primary            | 112 (78)                    | 52 (88)                           | 0.12    |
| Unknown primary              | 32 (22)                     | 7 (12)                            |         |
| Stage                        |                             |                                   |         |
| M0                           | 14 (10)                     | 11 (18)                           | 0.41    |
| M1A                          | 25 (17)                     | 11 (18)                           |         |
| M1B                          | 32 (22)                     | 12 (20)                           |         |
| M1C                          | 74 (51)                     | 27 (44)                           |         |
| Response                     |                             |                                   |         |
| CR                           | 13 (9)                      | 9 (15)                            | 0.43    |
| Unconfirmed CR               | 3 (2)                       | 0 (0)                             |         |
| PR                           | 76 (54)                     | 38 (64)                           |         |
| Unconfirmed PR               | 22 (16)                     | 6 (10)                            |         |
| Stable                       | 22 (16)                     | 5 (8)                             |         |
| Increasing disease           | 2 (1)                       | 0 (0)                             |         |
| Inadequate assessment        | 3 (2)                       | 1 (2)                             |         |

Supplemental Table 2A

| Covariate                                          | HR   | 80% CI       | P-value |
|----------------------------------------------------|------|--------------|---------|
| Prior checkpoint therapy (ref = No prior exposure) | 0.6  | (0.47, 0.77) | 0.009   |
| Intermittent Dosing (ref = Continuous Dosing)      | 1.57 | (1.27, 1.96) | 0.0073  |
| Age at randomization (years)                       | 0.99 | (0.98, 1)    | 0.17    |
| Male (ref = Female)                                | 0.93 | (0.73, 1.18) | 0.69    |
| PS 1 (ref = PS 0)                                  | 1.3  | (1.04, 1.62) | 0.13    |
| PS 2 (ref = PS 0)                                  | 3.2  | (1.23, 8.34) | 0.12    |
| Normal LDH (ref = Elevated LDH)                    | 0.63 | (0.5, 0.79)  | 0.01    |
| Unknown primary (ref = Cutaneous primary)          | 0.71 | (0.53, 0.95) | 0.13    |
| M1A (ref = M0)                                     | 1.24 | (0.79, 1.95) | 0.53    |
| M1B (ref = M0)                                     | 1.6  | (1.04, 2.46) | 0.16    |
| M1C (ref = M0)                                     | 1.9  | (1.27, 2.82) | 0.039   |

Supplemental Table 2B

| Covariate                                          | HR    | 80% CI        | P-value |
|----------------------------------------------------|-------|---------------|---------|
| Prior checkpoint therapy (ref = No prior exposure) | 0.86  | (0.63, 1.17)  | 0.52    |
| Intermittent Dosing (ref = Continuous Dosing)      | 1.13  | (0.85, 1.49)  | 0.58    |
| Age at randomization (years)                       | 1     | (0.99, 1.01)  | 0.81    |
| Male (ref = Female)                                | 0.63  | (0.47, 0.85)  | 0.051   |
| PS 1 (ref = PS 0)                                  | 2.16  | (1.64, 2.85)  | <0.001  |
| PS 2 (ref = PS 0)                                  | 12.71 | (4.48, 36.06) | 0.0018  |
| Normal LDH (ref = Elevated LDH)                    | 0.54  | (0.41, 0.73)  | 0.0069  |
| Unknown primary (ref = Cutaneous primary)          | 0.65  | (0.44, 0.95)  | 0.15    |
| M1A (ref = M0)                                     | 1.67  | (0.79, 3.5)   | 0.38    |
| M1B (ref = M0)                                     | 3.01  | (1.48, 6.13)  | 0.047   |
| M1C (ref = M0)                                     | 3.61  | (1.84, 7.09)  | 0.015   |

Supplemental Table 3

|       | Expansion index                 |                                      |                  | Size of top5 clones             |                                      |                  | Size of top10 clones            |                                      |                  |
|-------|---------------------------------|--------------------------------------|------------------|---------------------------------|--------------------------------------|------------------|---------------------------------|--------------------------------------|------------------|
|       | CD8 <sup>+</sup> T <sub>C</sub> | Ki-67 <sup>hi</sup> CD8 <sup>+</sup> | T <sub>REG</sub> | CD8 <sup>+</sup> T <sub>C</sub> | Ki-67 <sup>hi</sup> CD8 <sup>+</sup> | T <sub>REG</sub> | CD8 <sup>+</sup> T <sub>C</sub> | Ki-67 <sup>hi</sup> CD8 <sup>+</sup> | T <sub>REG</sub> |
| Day7  | 0.0630                          | 0.0000                               | 0.0086           | 0.0465                          | 0.0159                               | 0.0171           | 0.0734                          | 0.0159                               | 0.0282           |
| Day7  | 0.1796                          | 0.0204                               | 0.0000           | 0.1478                          | 0.1063                               | 0.1113           | 0.1777                          | 0.1096                               | 0.1213           |
| Day10 | 0.1852                          | 0.0000                               | 0.0074           | 0.1022                          | 0.0424                               | 0.0849           | 0.1283                          | 0.0424                               | 0.0945           |
| Day10 | 0.0193                          | 0.0000                               | 0.0000           | 0.1129                          | 0.0000                               | 0.0484           | 0.1532                          | 0.0000                               | 0.0887           |
| Day10 | 0.1392                          | 0.0817                               | 0.0000           | 0.2160                          | 0.0488                               | 0.0418           | 0.3031                          | 0.0488                               | 0.0592           |
| Day10 | 0.1416                          | 0.0817                               | 0.0000           | 0.1203                          | 0.0253                               | 0.0190           | 0.1582                          | 0.0253                               | 0.0190           |
| Day14 | 0.0067                          | 0.0000                               | 0.0067           | 0.0516                          | 0.0299                               | 0.0387           | 0.0616                          | 0.0299                               | 0.0464           |
| Day14 | 0.1175                          | 0.0000                               | 0.0066           | 0.0235                          | 0.0063                               | 0.0093           | 0.0334                          | 0.0066                               | 0.0136           |
| Day14 | 0.2392                          | 0.0000                               | 0.0334           | 0.1800                          | 0.0284                               | 0.1411           | 0.2141                          | 0.0284                               | 0.1492           |
| Day14 | 0.2210                          | 0.0245                               | 0.0000           | 0.1018                          | 0.0583                               | 0.0317           | 0.1372                          | 0.0590                               | 0.0398           |
